# Supplementary material
Source: PubMed Central journal article supplement (PMC6648188)
Supplement: Supp_Fig1.pdf [file Supp_Fig1.pdf]

## Supplementary Data

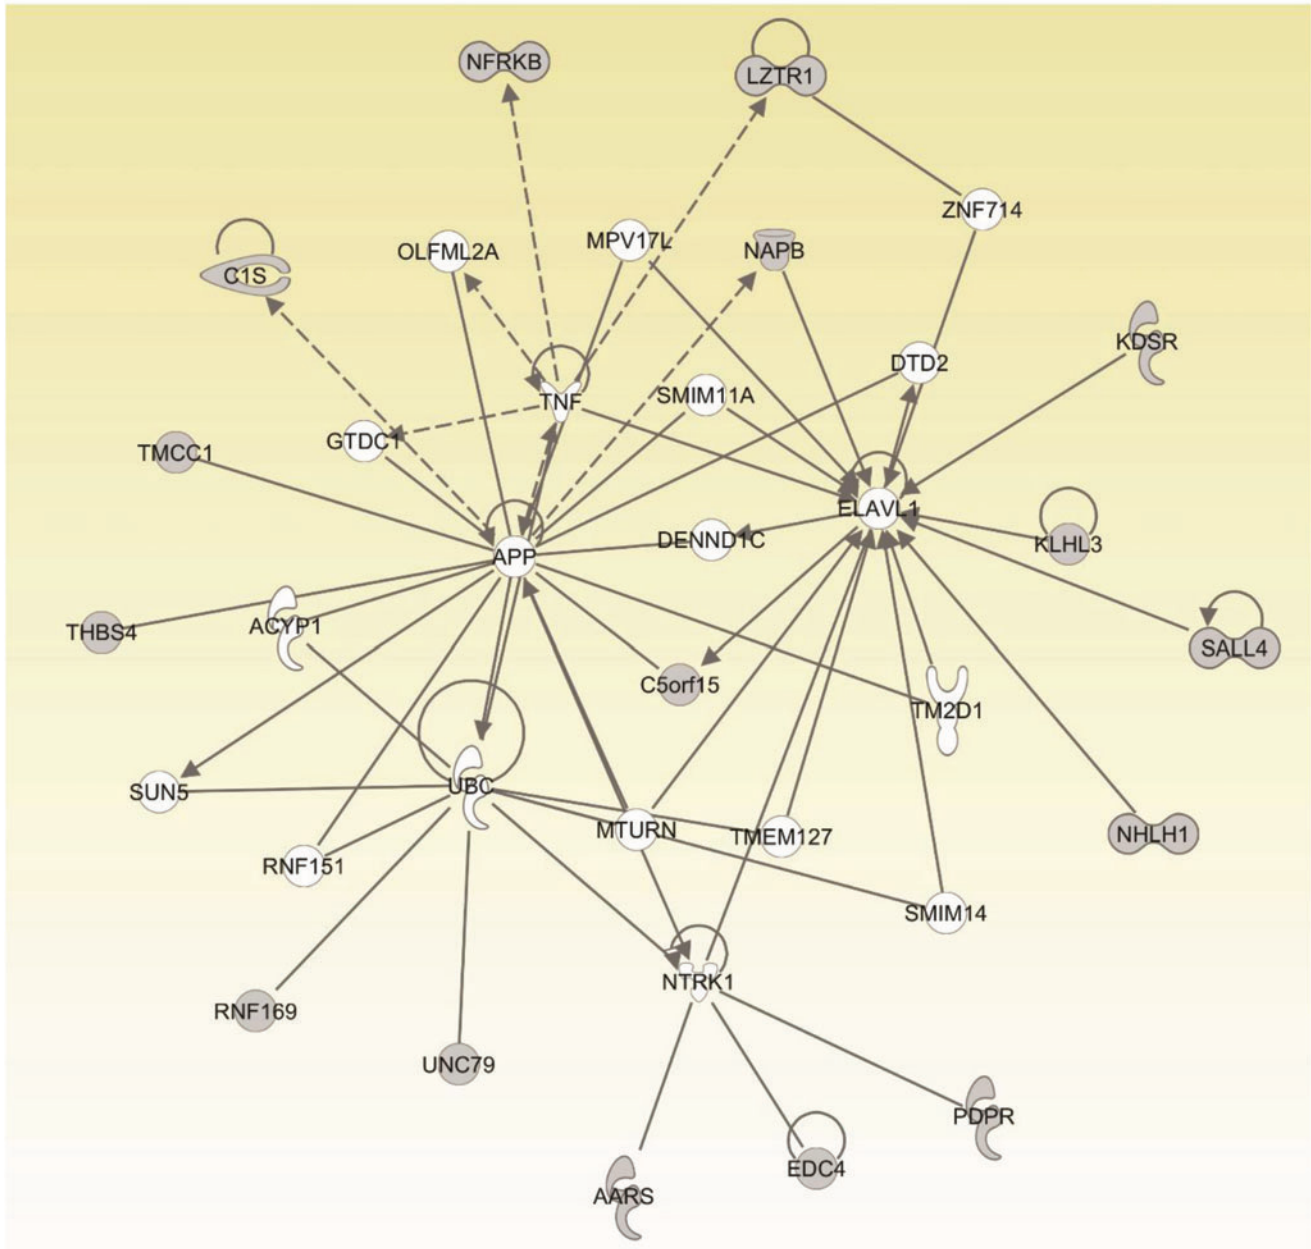

**SUPPLEMENTARY FIG. S1.** Top gene network of the 40 candidate genes by Ingenuity Pathway Analysis. All the genes belong to the top gene network involved in cell death and survival, lipid metabolism, and molecular transport. The solid line represents direct interaction, and the dotted line represents indirect interaction. Sixteen of the genes with a dark background are from the 40 candidate gene list.
