# Supplementary material
Source: PubMed Central journal article supplement (PMC6648188)
Supplement: Supp_Fig2.pdf [file Supp_Fig2.pdf]

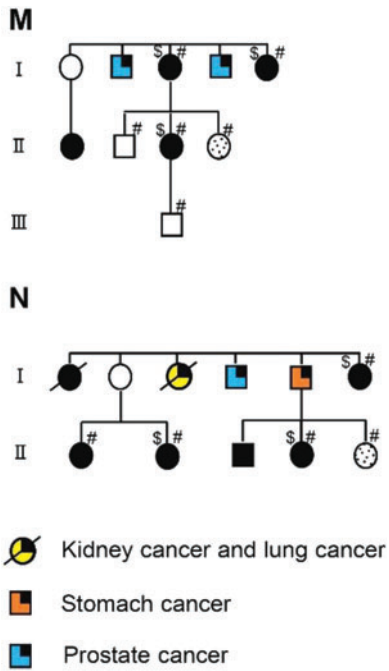

**SUPPLEMENTARY FIG. S2.** Detailed pedigrees of family M and family N. Family structures are indicated by the pedigree maps. Males are indicated by squares, and females are indicated by circles. Generation is labeled using Roman numerals (I, II, III, etc.). Deceased individuals are displayed as a symbol with a diagonal line. Yellow represents the individual with both kidney cancer and lung cancer; orange represents the individual with stomach cancer; blue represents the individuals with prostate cancer.
