# Supplementary material
Source: PubMed Central journal article supplement (PMC6648188)
Supplement: Supp_Table1.pdf [file Supp_Table1.pdf]

SUPPLEMENTARY TABLE S1. PRIMER INFORMATION OF THE 41 VARIANTS VALIDATED BY SANGER SEQUENCING

| Chr | Position  | Reference allele | Alternate allele | Gene            | Forward primer            | Reverse primer              |
|-----|-----------|------------------|------------------|-----------------|---------------------------|-----------------------------|
| 1   | 17316456  | C                | T                | <i>ATP13A2</i>  | GAGGCTAACCCAGAGTTCCA      | CCGTGAGGAAGGAGACAGAG        |
| 1   | 160340766 | C                | A                | <i>NHLH1</i>    | AGAGACTGAGTCGGGCTTCA      | CTGAGTTCAGACGTCACGCA        |
| 2   | 219267800 | C                | T                | <i>CTDSP1</i>   | GACCTCGTAGGTAGGACTGG      | CTACTGGTCTGCTACTGGG         |
| 3   | 50684626  | G                | T                | <i>MAPKAPK3</i> | GTAGTCCACAGACCCCACT       | CACACACTGAATGGCGTAG         |
| 3   | 129390026 | A                | C                | <i>TMCC1</i>    | TTCTTTTGCAGCTGGAGGAT      | TCGAACGGTTGGAAGTAAGC        |
| 4   | 74270076  | T                | A                | <i>ALB</i>      | GAGAAAACAGTTCCAGATGGTAAA  | CTTACGTGCATCTCGACGAA        |
| 5   | 79368179  | A                | G                | <i>THBS4</i>    | TGGCCAGGCAGAAAGTGAC       | TCGACAGCTGGGAGATAGT         |
| 5   | 133295603 | T                | C                | <i>C5orf15</i>  | CTTTTGGTGGCAGCTGTATGATG   | ACAGAGAGGTAGGCGAGGGATGAG    |
| 5   | 136997689 | T                | C                | <i>KLHL3</i>    | AACCCGTTTAGAGCACATGG      | GCCGTACATACATCCCACTG        |
| 5   | 176520192 | A                | G                | <i>FGFR4</i>    | ATGTTGGAGCTGGGAGGACTGA    | CGGGCCGCTGGAGGAGA           |
| 6   | 46655960  | T                | ins.             | <i>TDRD6</i>    | GCGGCCCGAGTGAGGTAAT       | CTAGCACGCAGCCACACTTC        |
| 7   | 141321533 | AT               | del.             | <i>AGK</i>      | TTTGTGCATGAGTGCATGTG      | TTTCATTATAACCTCATTTGAACCTGC |
| 7   | 150938678 | C                | T                | <i>SMARCD3</i>  | CCCTGGCTCCTTCTTCTCT       | GGCCCTGAACCTGCTGGTGC        |
| 9   | 140352197 | G                | T                | <i>NSMF</i>     | ACGGCCAGGCAGGCTCACTCAG    | CTGGGCACATCCGGGGCACTCC      |
| 10  | 29782280  | T                | G                | <i>SVIL</i>     | AGATTAAGTAAGGGCCTGGGAGC   | CGCCGCGTGAATGGAGT           |
| 10  | 94267395  | CAT              | C                | <i>IDE</i>      | TGCCCAACACCCCTTTCT        | ACGATGCCTTCCCTTACT          |
| 10  | 120832522 | T                | C                | <i>EIF5A</i>    | CTTGGCAAAGGAGGGGTTAT      | GTTATGGTGGCGCTGAATCT        |
| 11  | 74459941  | C                | T                | <i>RNF169</i>   | CGTACTGCCCGCCCTCCACTCTT   | CAACGGCGGCACAAACCAACA       |
| 11  | 129744416 | G                | A                | <i>NFRKB</i>    | AGAGCGGATTCACCAAGCACAAG   | GACTGGGTGGTGGCATACTG        |
| 12  | 7171685   | A                | C                | <i>C1S</i>      | TGAAATGTGATCCCTTGACG      | GAACTGGAAAGGGTGGACAA        |
| 12  | 95486473  | T                | C                | <i>FGD6</i>     | CTTGATCGAAGGCTCCCAT       | TGGTTATGAGGGGAAATATGCT      |
| 14  | 24710238  | AC               | A-               | <i>TINF2</i>    | CTGGGCAAAACATGTAAGG       | GATGTCCCTGAGGAAGATG         |
| 14  | 55836494  | G                | A                | <i>ATG14</i>    | CAGTGAATTTTGTGGCGAAA      | GCTCGTTAACGGTGTCCAGT        |
| 14  | 94088825  | T                | A                | <i>UNC79</i>    | GGCCCTCCGGTAAAATG         | CTGCCCTGGGAACAATCTGAATCTT   |
| 16  | 31434433  | A                | C                | <i>ITGAD</i>    | CTCCCAAAGTCTGGGATTA       | CACACGGTATCGATGCTCAG        |
| 16  | 31434434  | G                | A                | <i>ITGAD</i>    | CTCCCAAAGTCTGGGATTA       | CACACGGTATCGATGCTCAG        |
| 16  | 65005565  | T                | C                | <i>CDH11</i>    | TATTTATGGCCACCTTTCTCTT    | TTATTTTCCGGTTTCTTCTCA       |
| 16  | 67916998  | C                | G                | <i>EDC4</i>     | TACAGCGCATCGTTAAGGGTGAGG  | CAAAGTGGGCTAGGTGGGAAGAAA    |
| 16  | 70161297  | G                | C                | <i>PDP1R</i>    | GATGGCAGACTACTCAAACAACACT | GGCCCAAGCTCTCCCAACAAG       |
| 16  | 70304179  | G                | A                | <i>AARS</i>     | GGCAGCTTGAGTCTCTGCTT      | AGCCTGGAAAACCTCCACAGA       |
| 17  | 78318734  | AT               | A-               | <i>RNF213</i>   | CAAAGAAGCTCTGTGCAAGG      | TGGTCAGAGGTGTGGAGTGA        |
| 18  | 61006104  | C                | T                | <i>KDSR</i>     | ACAATTTGTTTGGCCACCTG      | TGATTTAGAATCCAGATGGACCTT    |
| 19  | 35175846  | C                | T                | <i>ZNF302</i>   | TTGGAATATACAGAAATGCGACA   | CCGTGATAAACACTGCTTCTCTT     |
| 19  | 46376146  | G                | C                | <i>FOXA3</i>    | CCTATTTCACTGGCCTGGAG      | CAAAGCTTCGTGGTGTGAG         |
| 19  | 57932175  | G                | T                | <i>ZNF17</i>    | GGCCTTTTATTGCTGTAA        | AAAGGATTTCCACACAATGC        |
| 20  | 5155891   | T                | G                | <i>CDS2</i>     | AGCTCAGGGCCCTCATCTCAG     | ACCCCGTCAATTCCACAAA         |
| 20  | 23358093  | C                | T                | <i>NAPB</i>     | AACACAGACTTGGCGAGCTT      | CATGGGGTAATTCCTGTTC         |
| 20  | 31466614  | G                | C                | <i>EFCA8</i>    | TGAAAGGCTGAGCCATTTTGC     | CAAAGGACATCAGGCAGCAG        |
| 20  | 50407707  | G                | T                | <i>SALL4</i>    | GAGAGAGACCCTTCGTTGTC      | GGTGGCCTTGCAATGTCT          |
| 22  | 21351254  | A                | G                | <i>LZTR1</i>    | TGTTTGGGGCCCCCTACTACTAGG  | CAGGCACGGGATTTCTCACAA       |
| 9   | 132845876 | T                | C                | <i>GPR107</i>   | TGGGTACATGGTGTGAATG       | ATTTCTCTCCCATGGCCCTT        |
