# Supplementary material
Source: PubMed Central journal article supplement (PMC6648188)
Supplement: Supp_Table2.pdf [file Supp_Table2.pdf]

SUPPLEMENTARY TABLE S2. CLINICAL CHARACTERS  
OF THE 56 NMTC PATIENTS USED  
FOR WHOLE-GENOME SEQUENCING

| <i>Classification</i>                   | <i>Number</i> |
|-----------------------------------------|---------------|
| <b>Cohort</b>                           |               |
| PTC patient                             | 56            |
| PTC family                              | 17            |
| <b>Sex</b>                              |               |
| Female                                  | 38            |
| Male                                    | 18            |
| <b>Age at diagnosis (55/56)</b>         |               |
| < 50                                    | 34            |
| 50–59                                   | 12            |
| 60–69                                   | 5             |
| 70–79                                   | 3             |
| 80+                                     | 1             |
| <b>Histology (54/56)</b>                |               |
| Papillary carcinoma, NOS                | 7             |
| Papillary carcinoma, classic type       | 34            |
| Papillary carcinoma, follicular variant | 13            |
| <b>Tumor size (51/56)</b>               |               |
| 0.2–1.0 cm                              | 23            |
| 1.0–2.0 cm                              | 17            |
| 2.0–3.0 cm                              | 4             |
| > 3.0 cm                                | 7             |

PTC, papillary thyroid carcinoma.
